# Supplementary material
Source: publisher figshare collection journal article supplement (https://sage.figshare.com/ndownloader/files/18811280)
Supplement: Supplementary file 1 [file 18811280]

Supplementary Table 4.

*Predictors associated with PCP Burnout*

| Predictors                                                                                                                                                   | Association with Burnout |
|--------------------------------------------------------------------------------------------------------------------------------------------------------------|--------------------------|
| Poor work control                                                                                                                                            | ↑                        |
| Time pressure                                                                                                                                                | ↑                        |
| High workload/demands                                                                                                                                        | ↑                        |
| Task discordance                                                                                                                                             | ↑                        |
| Patient panel overcapacity                                                                                                                                   | ↑                        |
| Chaotic practice environments                                                                                                                                | ↑                        |
| Poor staffing                                                                                                                                                | ↑                        |
| Staff turnover                                                                                                                                               | ↑                        |
| Full-time employment                                                                                                                                         | ↑                        |
| Working > 40 hours/week                                                                                                                                      | ↑                        |
| Not working in teams                                                                                                                                         | ↑                        |
| Certain patient care tasks                                                                                                                                   | ↑                        |
| Use of EHRs                                                                                                                                                  | ↑                        |
| Greater out-of-work hours spent using the EHR                                                                                                                | ↑                        |
| PCPs in accountable care organizations                                                                                                                       | ↑                        |
| Working extended hours during weekends                                                                                                                       | ↑                        |
| Career dissatisfaction                                                                                                                                       | ↑                        |
| Lower PCP satisfaction with resources needed to care for complex patients                                                                                    | ↑                        |
| Lower PCP perceptions of being able to care for complex patients                                                                                             | ↑                        |
| Certain types of primary care practices (e.g., Non-solo primary care practices, Hospital/Health system owned practice, & Federally Qualified Health Centers) | ↑                        |
| Availability of clinic resources to address patient needs                                                                                                    | ↓                        |
| Task delegation                                                                                                                                              | ↓                        |
| Presence of a PACT coach                                                                                                                                     | ↓                        |
| Sense of calling                                                                                                                                             | ↓                        |
| Consistently working with the same staff                                                                                                                     | ↓                        |
| Positive team culture                                                                                                                                        | ↓                        |
| Tighter team structure                                                                                                                                       | ↓                        |
| Participatory decision making                                                                                                                                | ↓                        |
| Effective team communication                                                                                                                                 | ↓                        |
| Higher levels of behavioral health integration in primary care                                                                                               | ↓                        |
| Alignment of personal values with administration                                                                                                             | ↓                        |
| Strong emphasis on leadership, communication, trust, & teamwork within practices                                                                             | ↓                        |
| Length of tenure                                                                                                                                             | *                        |
| Sex                                                                                                                                                          | *                        |

*Note.* “↑” increases burnout; “↓” decreases burnout; “\*” mixed; EHR = electronic health record; PCP = primary care provider; PACT = Patient Aligned Care Team;
